# Supplementary material for: Exploratory analysis of interleukin‐38 in hospitalized COVID‐19 patients
Source: PubMed Central journal article supplement (PMC9601778; doi:10.1002/iid3.712), 2022-10-26

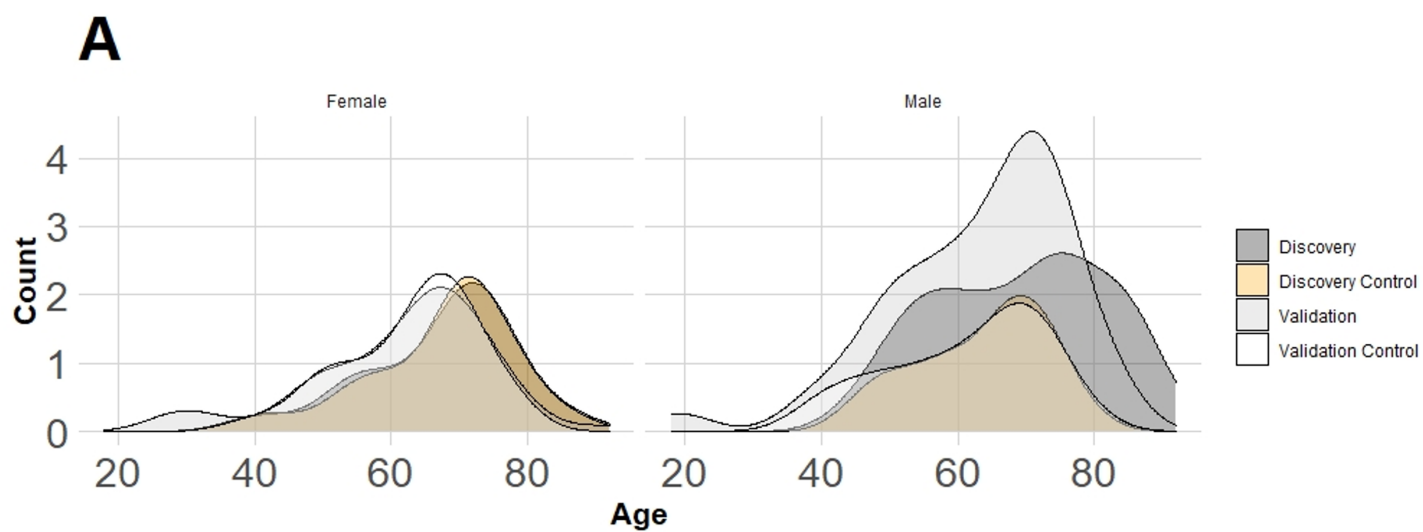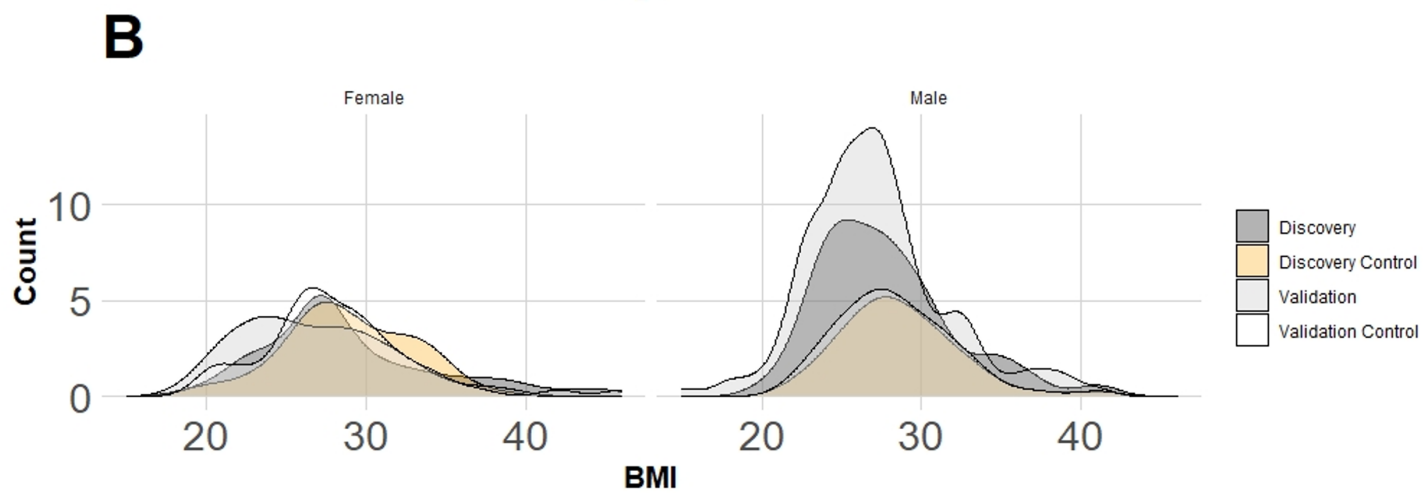

Supplement: IID3-10-e712-s004.pdf [file IID3-10-e712-s004.pdf]
