# Supplementary material for: Exploratory analysis of interleukin‐38 in hospitalized COVID‐19 patients
Source: Immun Inflamm Dis. 2022 Oct 26;10(11):e712. doi: 10.1002/iid3.712 (PMC9601778; doi:10.1002/iid3.712)

## A Blood Leukocyte Differentiation vs. IL-38

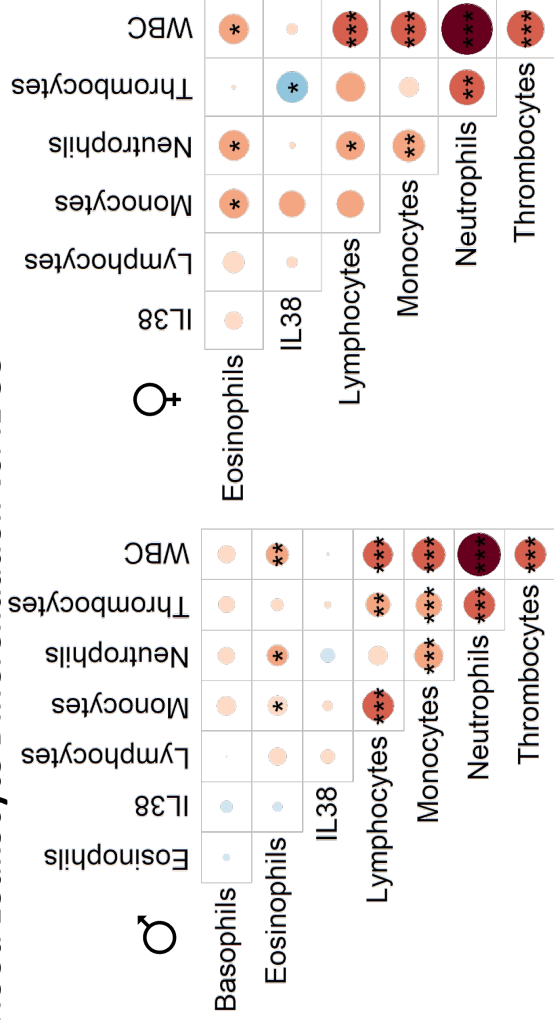

## C Oxygen Supplementation vs. IL-38

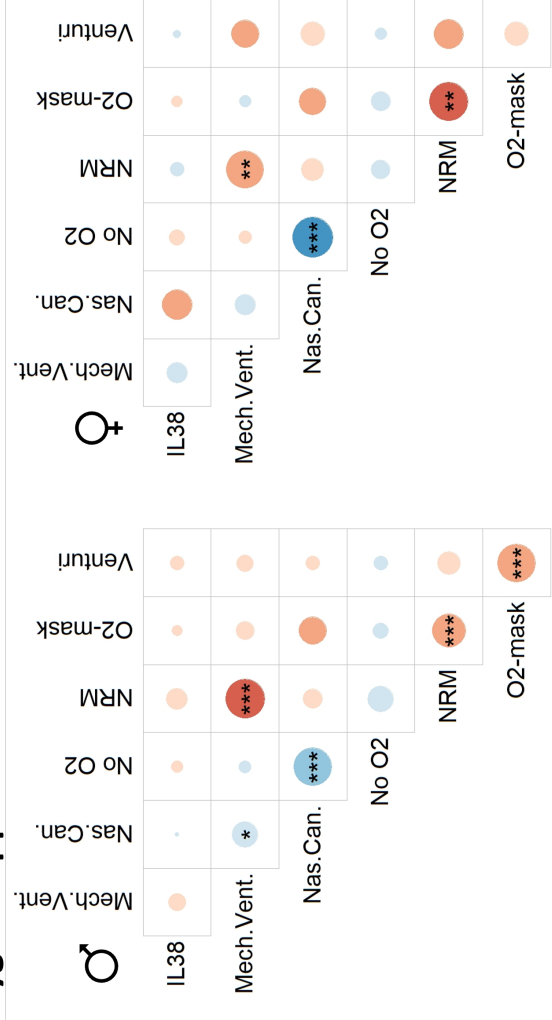

## B ICU Complications vs. IL-38

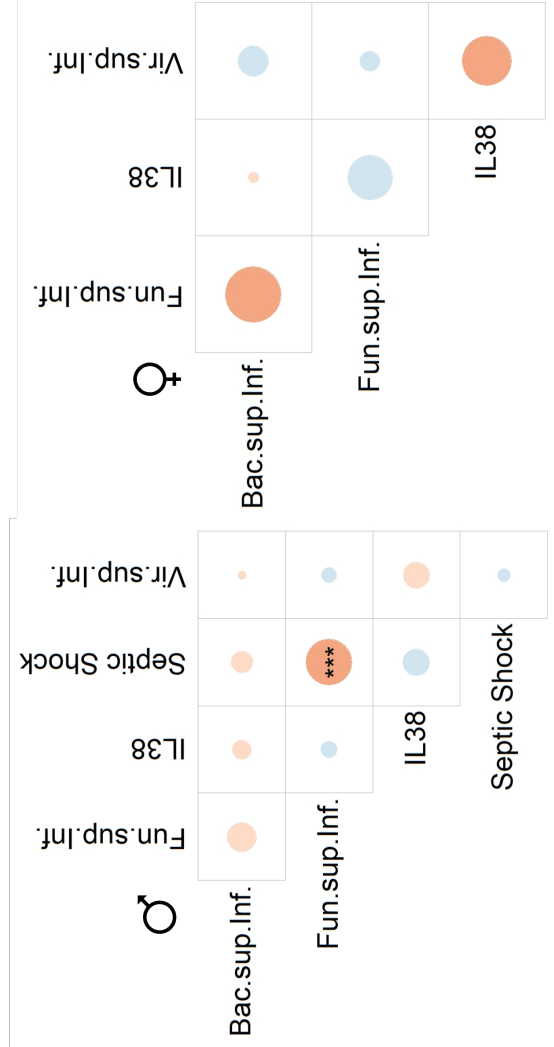

## D Inflammatory Markers vs. IL-38

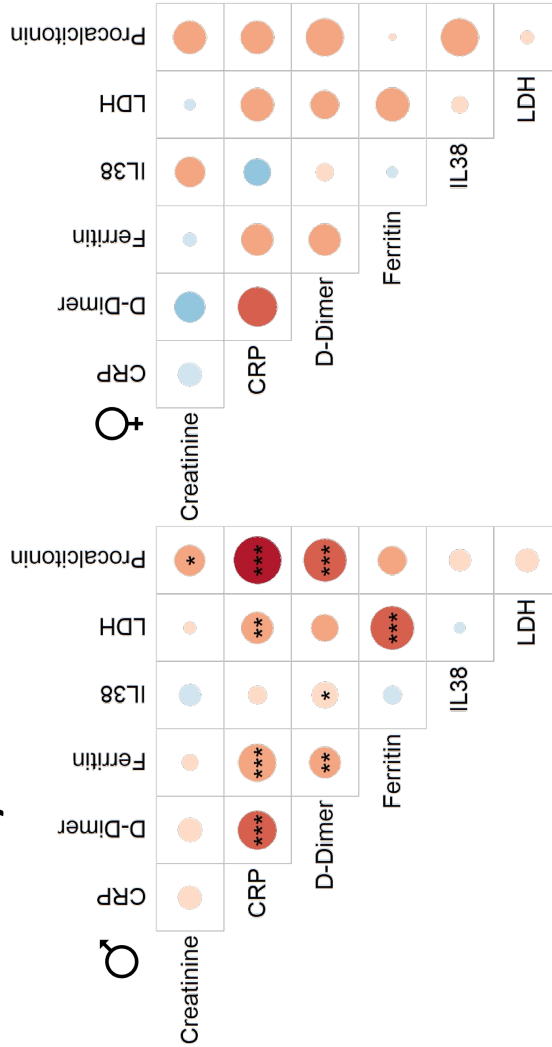

Supplement: Supplementary file 2 — Supplementary information. [file IID3-10-0-s001.pdf]
